# Supplementary material
Source: publisher figshare collection journal article supplement (https://geolsoc.figshare.com/ndownloader/files/22475864)
Supplement: Supplementary file 1 [file 22475864]

## Sheet: Sheet1
	AT11									AT3						AT4							AT9						AT37
SiO2	0.007	0.017	0.026	0.06	0.039	0.06	0.008	0.028		0.04	0	0.01	0.031	0.061		0.03	0.045	0.053	0.015	0	0.052		0.007	0.038	0.035	0.015	0.071		0.093
TiO2	50.582	52.758	50.456	52.701	51.298	52.303	51.146	51.243		49.684	51.281	49.207	50.201	48.923		50.432	49.863	49.969	49.79	49.901	48.477		48.844	49.828	49.09	49.624	48.378		50.006
Al2O3	0.596	0.066	0.075	0.007	0.076	0.002	0.129	0.19		0.01	0.021	0.027	0	0.009		0.018	0	0.027	0	0.006	0.07		0.025	0.039	0.024	0.005	0		0.012
Cr2O3	1.225	0.336	0.909	0.086	1.396	0.491	0.755	1.097		0.005	0	0	0.047	0		0.006	0.036	0	0.02	0	0		0.011	0.031	0	0	0.016		0.005
FeO	43.293	43.829	44.332	44.685	44.326	44.788	44.039	44.264		44.629	43.62	44.917	44.555	44.192		44.255	44.381	43.711	44.753	45.032	45.613		45.059	45.511	44.382	45.613	45.698		44.914
MnO	1.02	1.025	0.877	2.015	2.031	2.013	0.855	0.77		2.515	2.314	2.343	2.381	2.384		2.561	2.234	2.541	2.453	2.572	2.191		1.717	1.757	1.811	1.624	1.717		2.3
MgO	1.9	1.917	2.638	1.201	1.125	1.002	2.413	2.516		0.145	0.109	0.138	0.12	0.154		0.122	0.121	0.128	0.12	0.135	0.096		0.088	0.09	0.107	0.097	0.078		0.148
CaO	0.003	0.004	0.024	0.045	0.007	0.019	0.014	0.013		0.028	0.016	0	0.045	0.144		0.013	0.07	0.018	0.027	0.051	0.028		0.1	0.052	0.04	0.04	0.023		0.17
Na2O	0	0	0	0	0	0.039	0.066	0.02		0.024	0.02	0	0	0.019		0	0	0	0	0	0.01		0.052	0.008	0.007	0.002	0		0
K2O	0	0	0	0	0	0	0	0		0.002	0.004	0	0.002	0		0	0.001	0.004	0	0	0		0	0.004	0	0.002	0.002		0
P2O5	0.006	0	0	0.006	0.038	0	0	0		0	0	0.005	0	0		0	0.014	0	0	0	0		0	0	0.004	0.031	0		0.013
Total	98.724	100.031	99.432	100.815	100.368	100.717	99.426	100.141		97.368	97.648	96.722	97.518	96.236		97.508	96.891	96.517	97.222	97.883	96.619		96.062	97.498	95.627	97.123	96.234		97.947
